# Supplementary material for: The tunneling electroresistance effect in a van der Waals ferroelectric tunnel junction based on a graphene/In2Se3/MoS2/graphene heterostructure
Source: Royal Society of Chemistry journal article supplement (doi:10.1039/d3cp04408d), 2023-01-01
Supplement: d3cp04408d1.pdf [file d3cp04408d1.pdf]

## **Supporting Information for**

### **Tunneling electroresistance effect in van der Waals ferroelectric tunnel junction based on graphene/In<sub>2</sub>Se<sub>3</sub>/MoS<sub>2</sub>/graphene heterostructure**

Yu-Zhu Liu, Jian-Qing Dai,\* Jin Yuan, and Miao-Wei Zhao

Faculty of Materials Science and Engineering, Kunming University of Science and  
Technology, Kunming 650093, P. R. China

\*Corresponding author. Fax: +86 871 65107922.

E-mail address: [djqkust@sina.com](mailto:djqkust@sina.com) (J.-Q. Dai).

ORCID: 0000-0003-4352-0789 (Jian-Qing Dai)

## 1. Comparison of the results calculated by two software

To verify the consistency of the calculation results between the two software, we calculate the electronic band structures of monolayer  $\text{In}_2\text{Se}_3$  [see Fig.S1(a) and (b)] and  $\text{MoS}_2$  [see Fig.S1(c) and (d)] using the Vienna ab initio simulation package (VASP) and Nanodcal package. Their band structures are basically the same, but there are differences in the band gaps. Specifically, we observe that the band gaps calculated using the Nanodcal are always larger than those obtained from the VASP, while the results calculated using the Nanodcal are closer to the experimental values. The experimental band gap values for  $\text{In}_2\text{Se}_3$  and  $\text{MoS}_2$  are 1.39 eV<sup>1</sup> and 1.83 eV,<sup>2</sup> respectively. This is because VASP and the Nanodcal use different basis sets and pseudopotentials. The Nanodcal uses the double- $\zeta$  polarized (DZP) atomic-orbital basis and Troullier–Martins pseudopotentials.<sup>3,4</sup> VASP uses a plane wave basis set and projector-augmented-wave potentials.

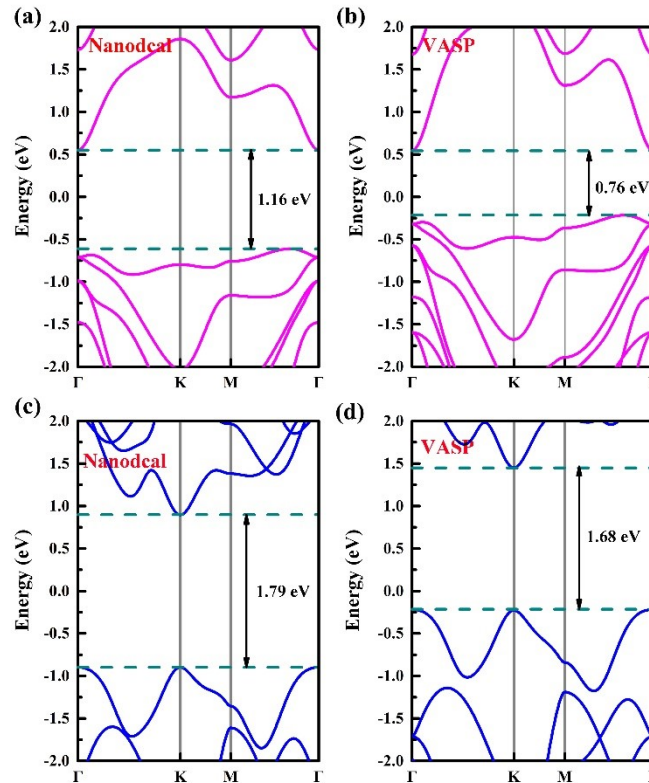

Fig. S1 The band structures of monolayer  $\text{In}_2\text{Se}_3$  [(a) and (b)] and  $\text{MoS}_2$  [(c) and (d)].

## 2. Other supporting results

We use the VASP to calculate the band structures of  $\text{In}_2\text{Se}_3/\text{MoS}_2$  vdW heterostructures. In the  $P_\uparrow$  state of the  $\text{In}_2\text{Se}_3/\text{MoS}_2$  system, it is evident that the conduction band minimum (CBM) and valence band minimum (VBM) are mainly contributed by  $\text{In}_2\text{Se}_3$ , having an indirect band gap of 0.94 eV. As a result, the band structure displays a quasi type-I band alignment. When the polarization of  $\text{In}_2\text{Se}_3$  is reversed, the band alignment is also changed from type-I to type-II. This also leads to a reduction in the band gap to 0.42 eV, where the  $\text{In}_2\text{Se}_3$  layer contributes to the CBM and the  $\text{MoS}_2$  layer contributes to the VBM.

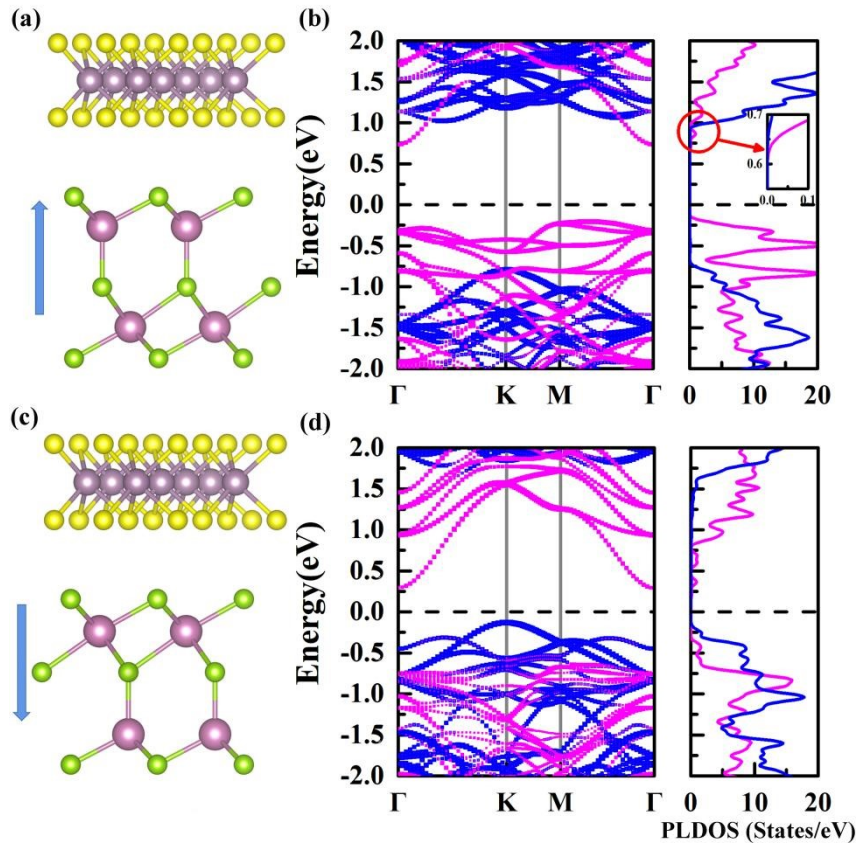

Fig. S2 Side view (a) and (c) of  $\text{In}_2\text{Se}_3/\text{MoS}_2$  heterostructures, the blue arrows indicate the direction of out-of-plane electric polarization in  $\text{In}_2\text{Se}_3$  layer. Projected band structures and the projected density of states for (b)  $\text{In}_2\text{Se}_3/\text{MoS}_2\text{-}\uparrow$  and (d)  $\text{In}_2\text{Se}_3/\text{MoS}_2\text{-}\downarrow$  calculated by using VASP method. The cyan lines represent contributions from the  $\text{MoS}_2$  layer and magenta lines represent the  $\text{In}_2\text{Se}_3$  layer.

- 
- <sup>1</sup> B. Nilanthy, D. S. Elisabeth, F. S. Emily, R. K. Zakhar, D. K. Zakhar, E. Laurence, P. Amelia, H. B. Peter, Epitaxial growth of  $\gamma$ -InSe and  $\alpha$ ,  $\beta$ , and  $\gamma$ -In<sub>2</sub>Se<sub>3</sub> on  $\epsilon$ -GaSe, *2D Mater.*, 5 (2018) 035026.
- <sup>2</sup> Z. Y. Yin, H. Li, H. Li, L. Jiang, Y. M. Shi, Y. H. Sun, G. Lu, Q. Zhang, X. D. Chen, and H. Zhang, Single-Layer MoS<sub>2</sub> Phototransistors, *ACS Nano.*, 6 (2012) 74-80.
- <sup>3</sup> N. Troullier and J. L. Martins, Efficient pseudopotentials for plane-wave calculations, *Phys. Rev. B*, 1991, 43 (1991) 1993–2006.
- <sup>4</sup> M. Y. Chen, Z. Z. Yu, Y. Wang, Y. Q. Xie, J. Wang and H. Guo, Nonequilibrium spin injection in monolayer black phosphorus, *Phys. Chem. Chem. Phys.*, 18 (2016) 1601.
